# Supplementary material
Source: Springer Nature journal article supplement (https://cannabishub.eu/wp-content/uploads/2026/04/41997_2025_1022_MOESM2_ESM.pdf)

# Cannabis Edibles

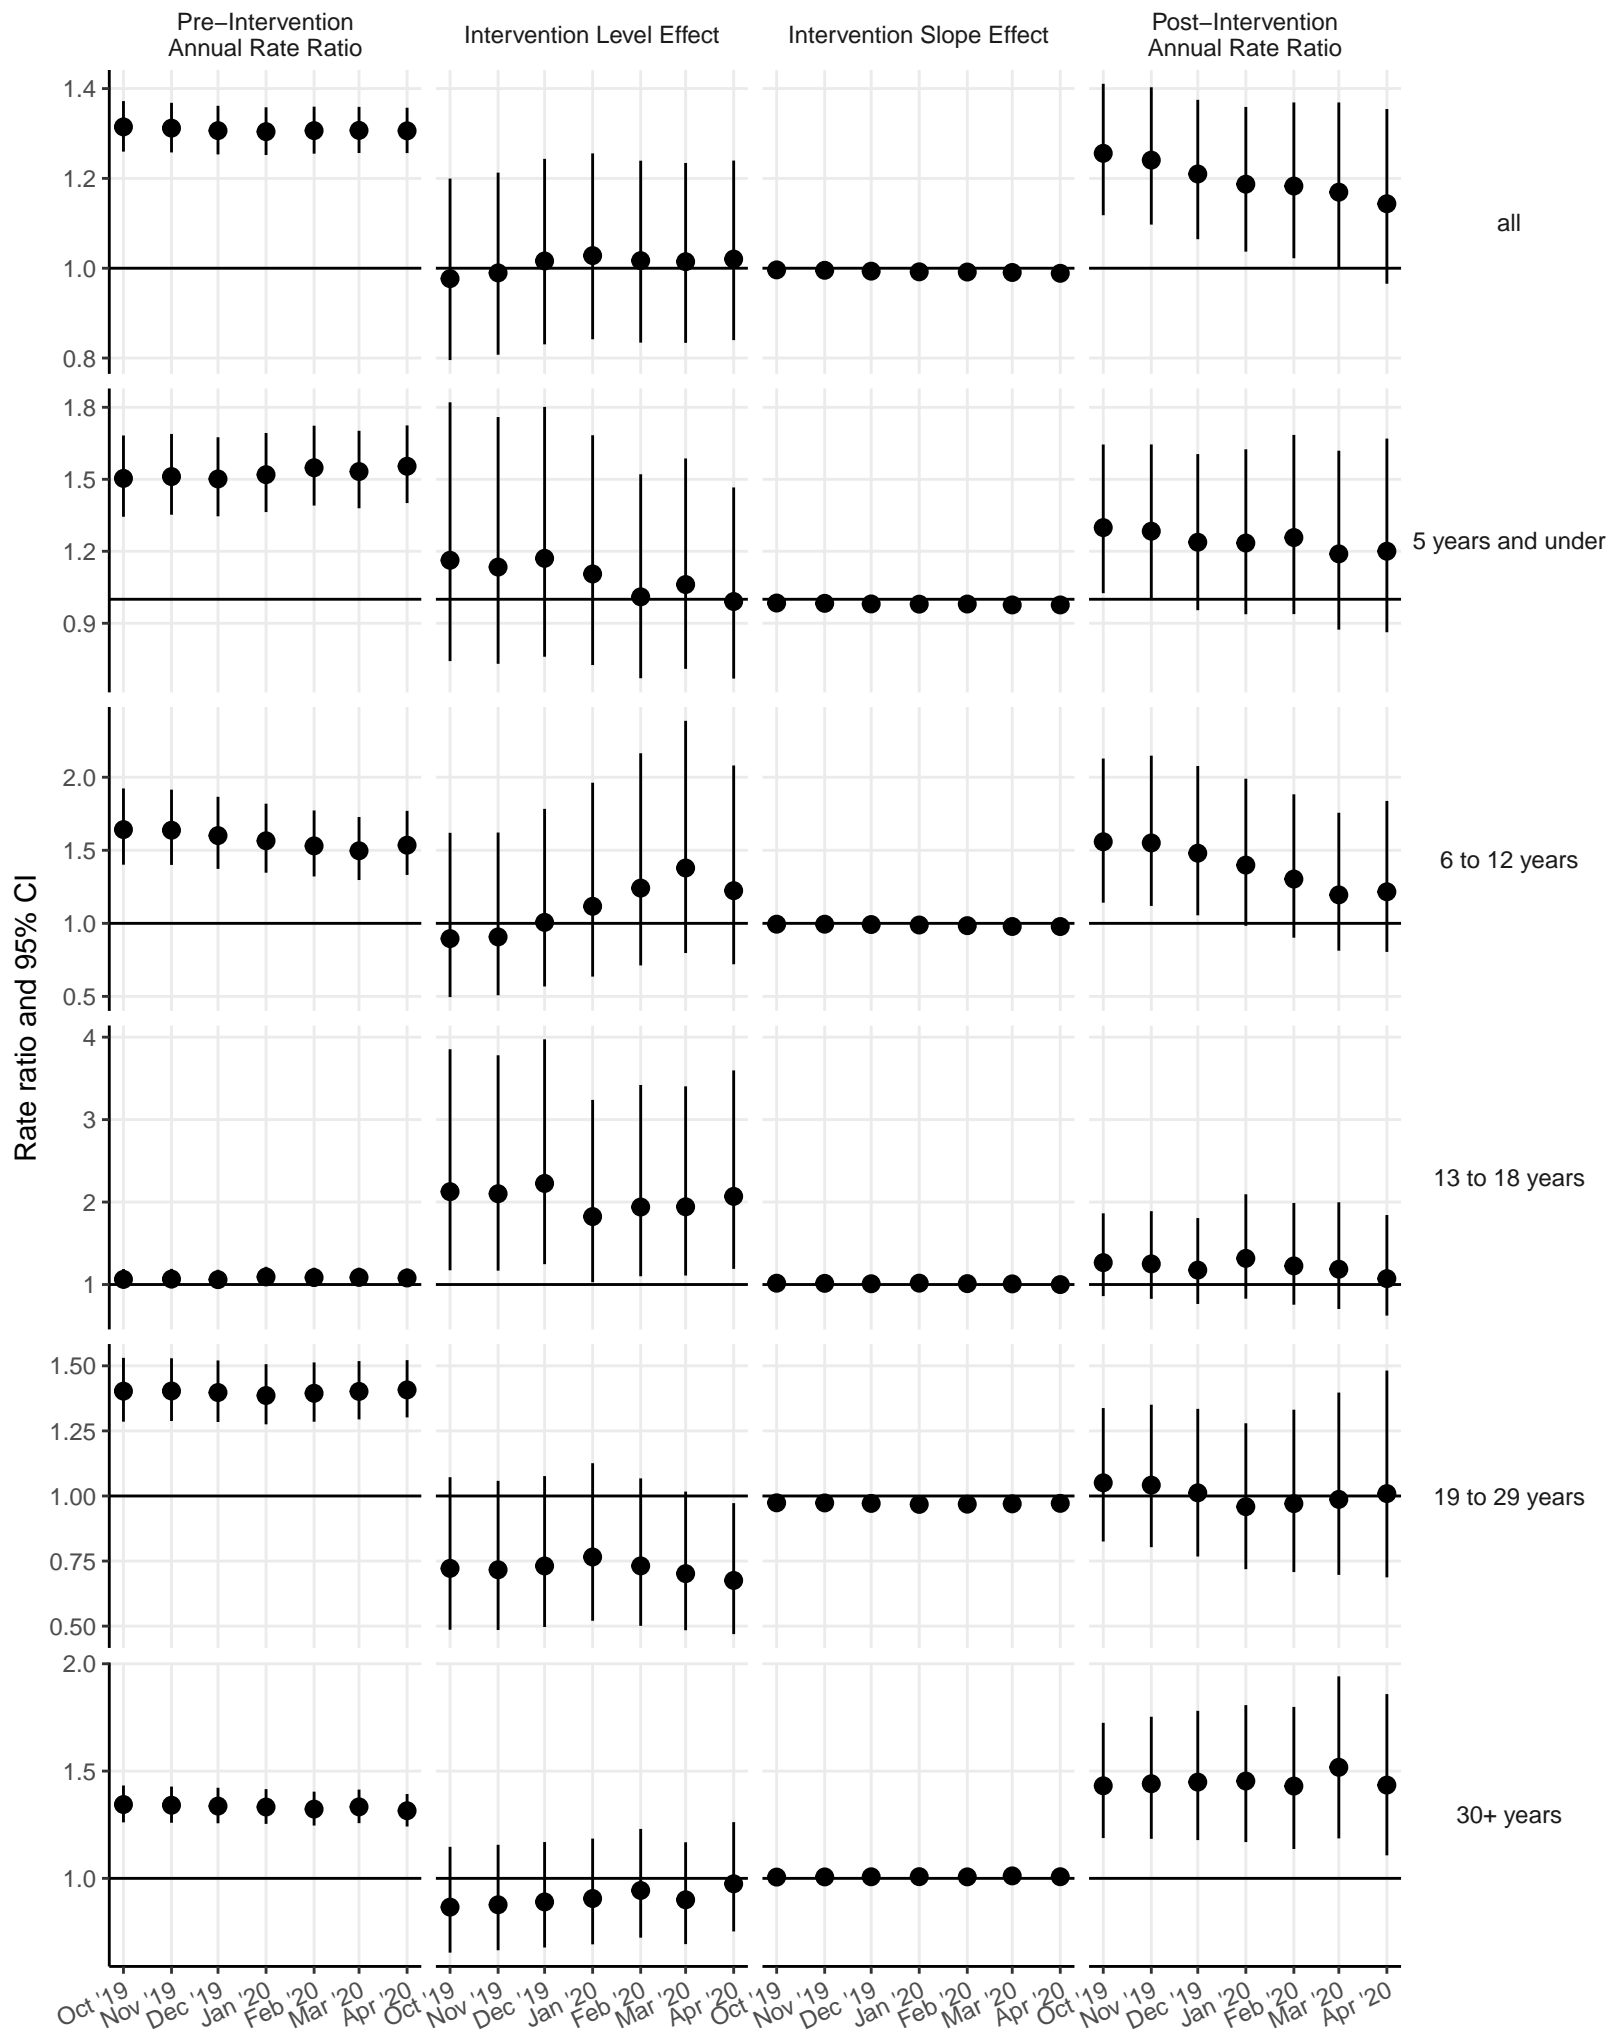

# Inhaled Dried Flower

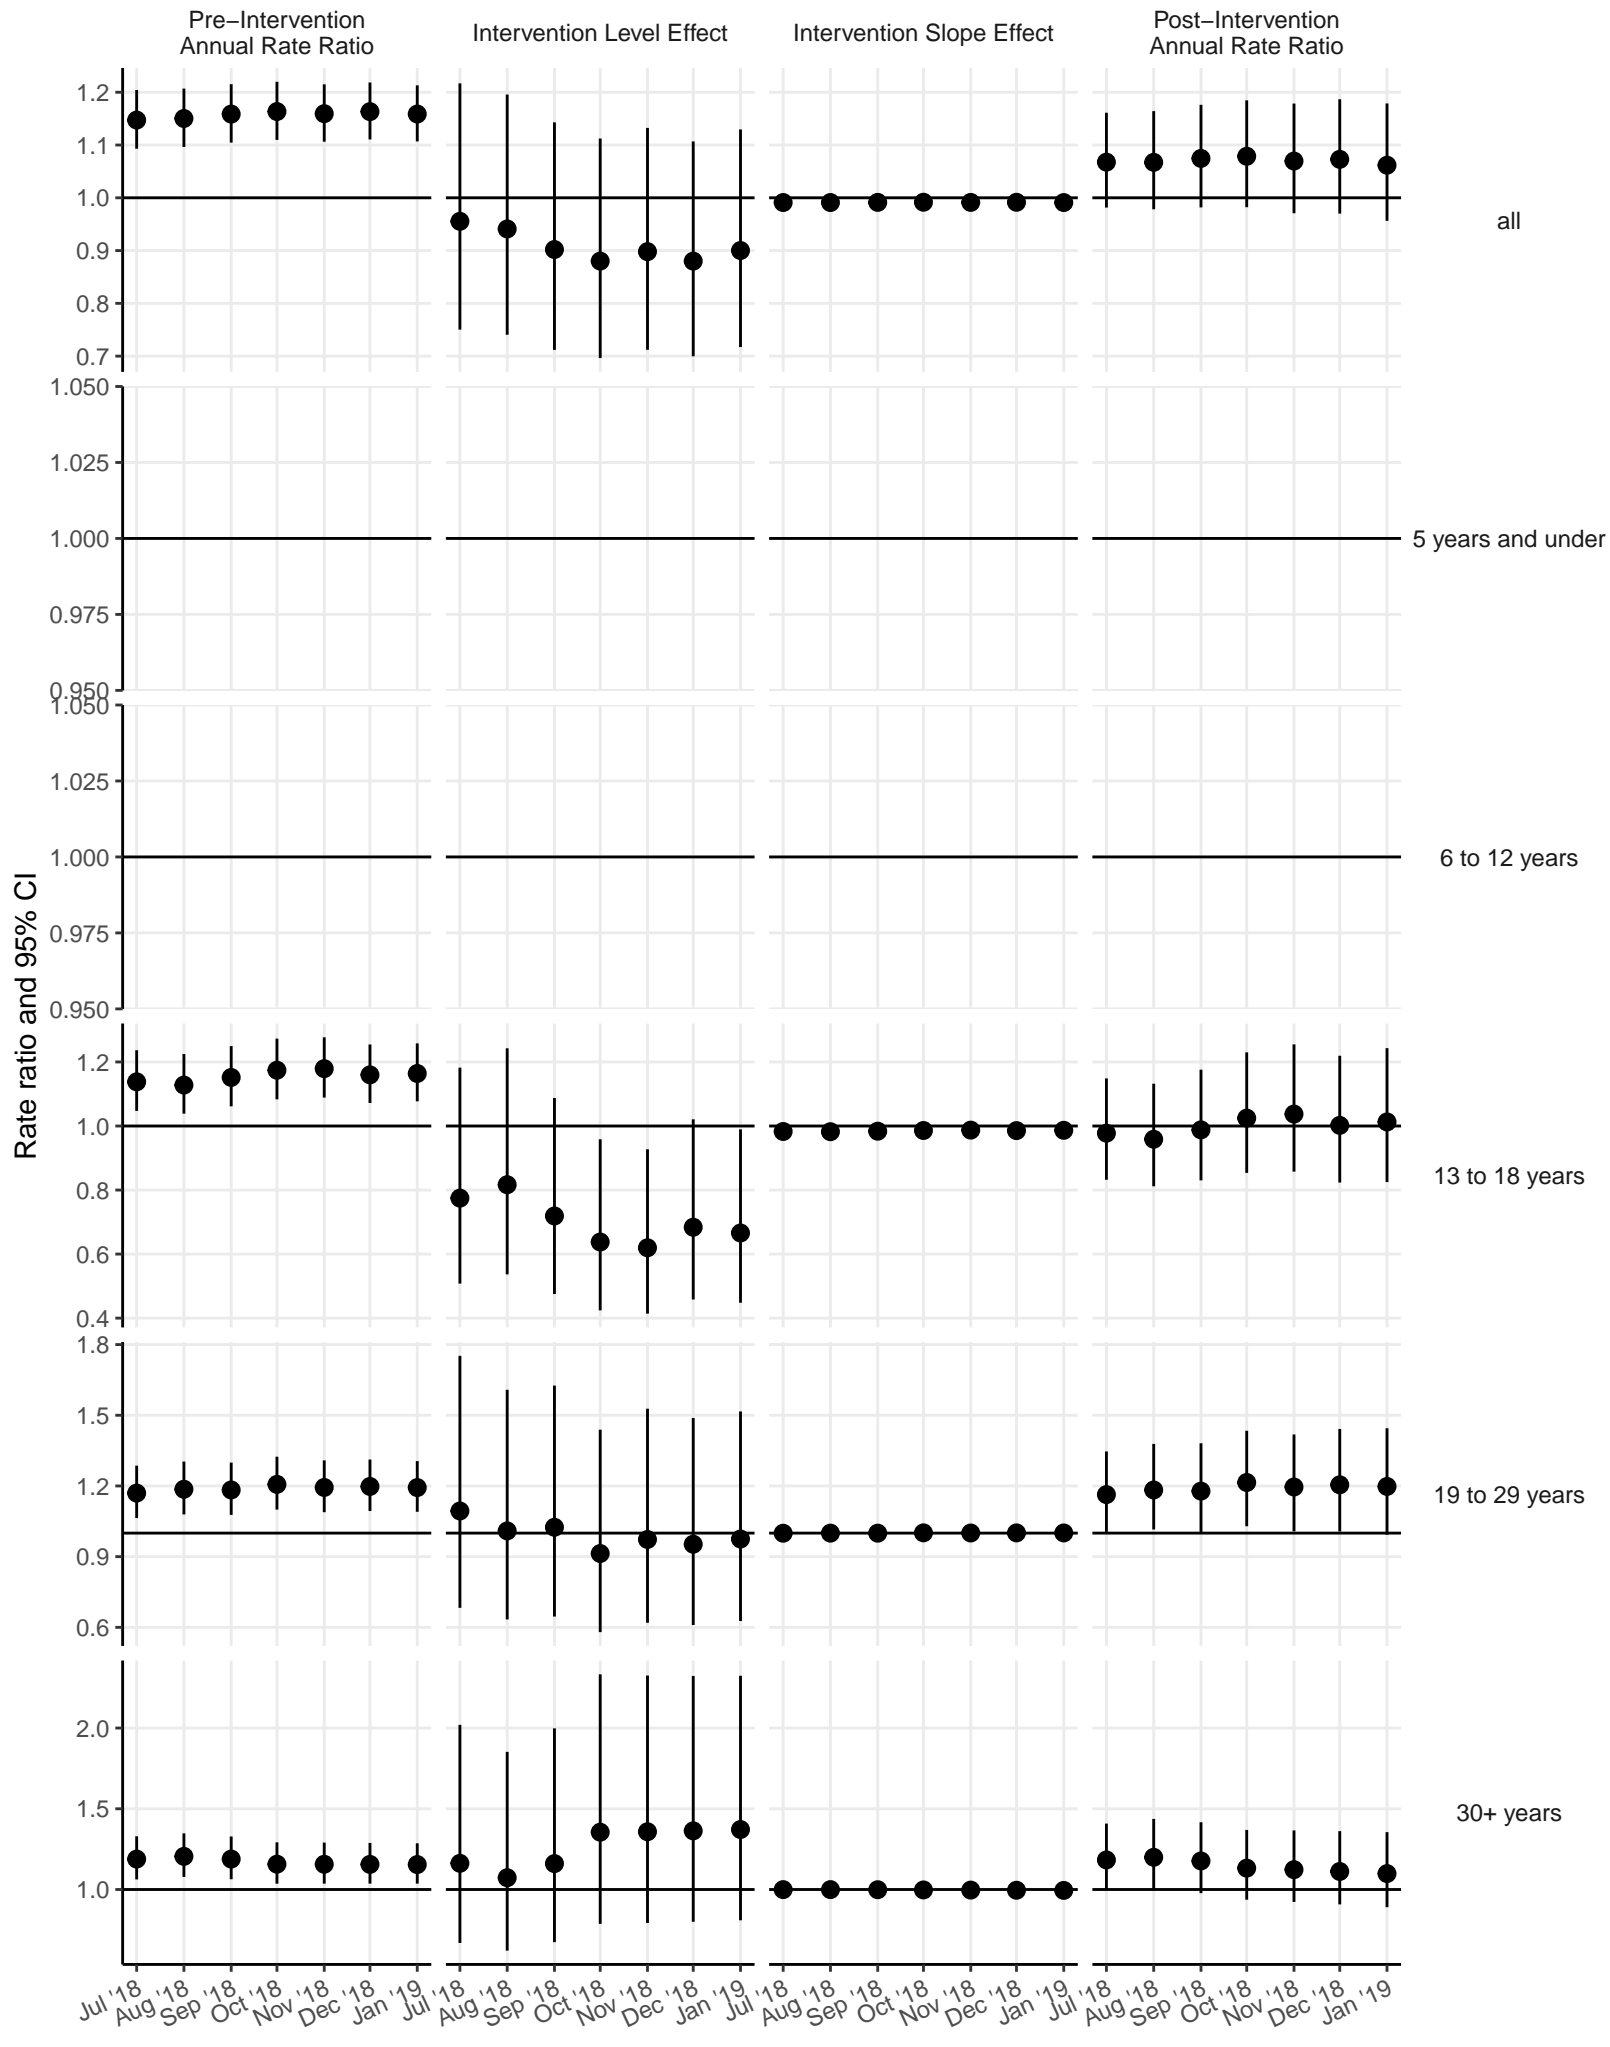

# Ingestible Oils and Capsules

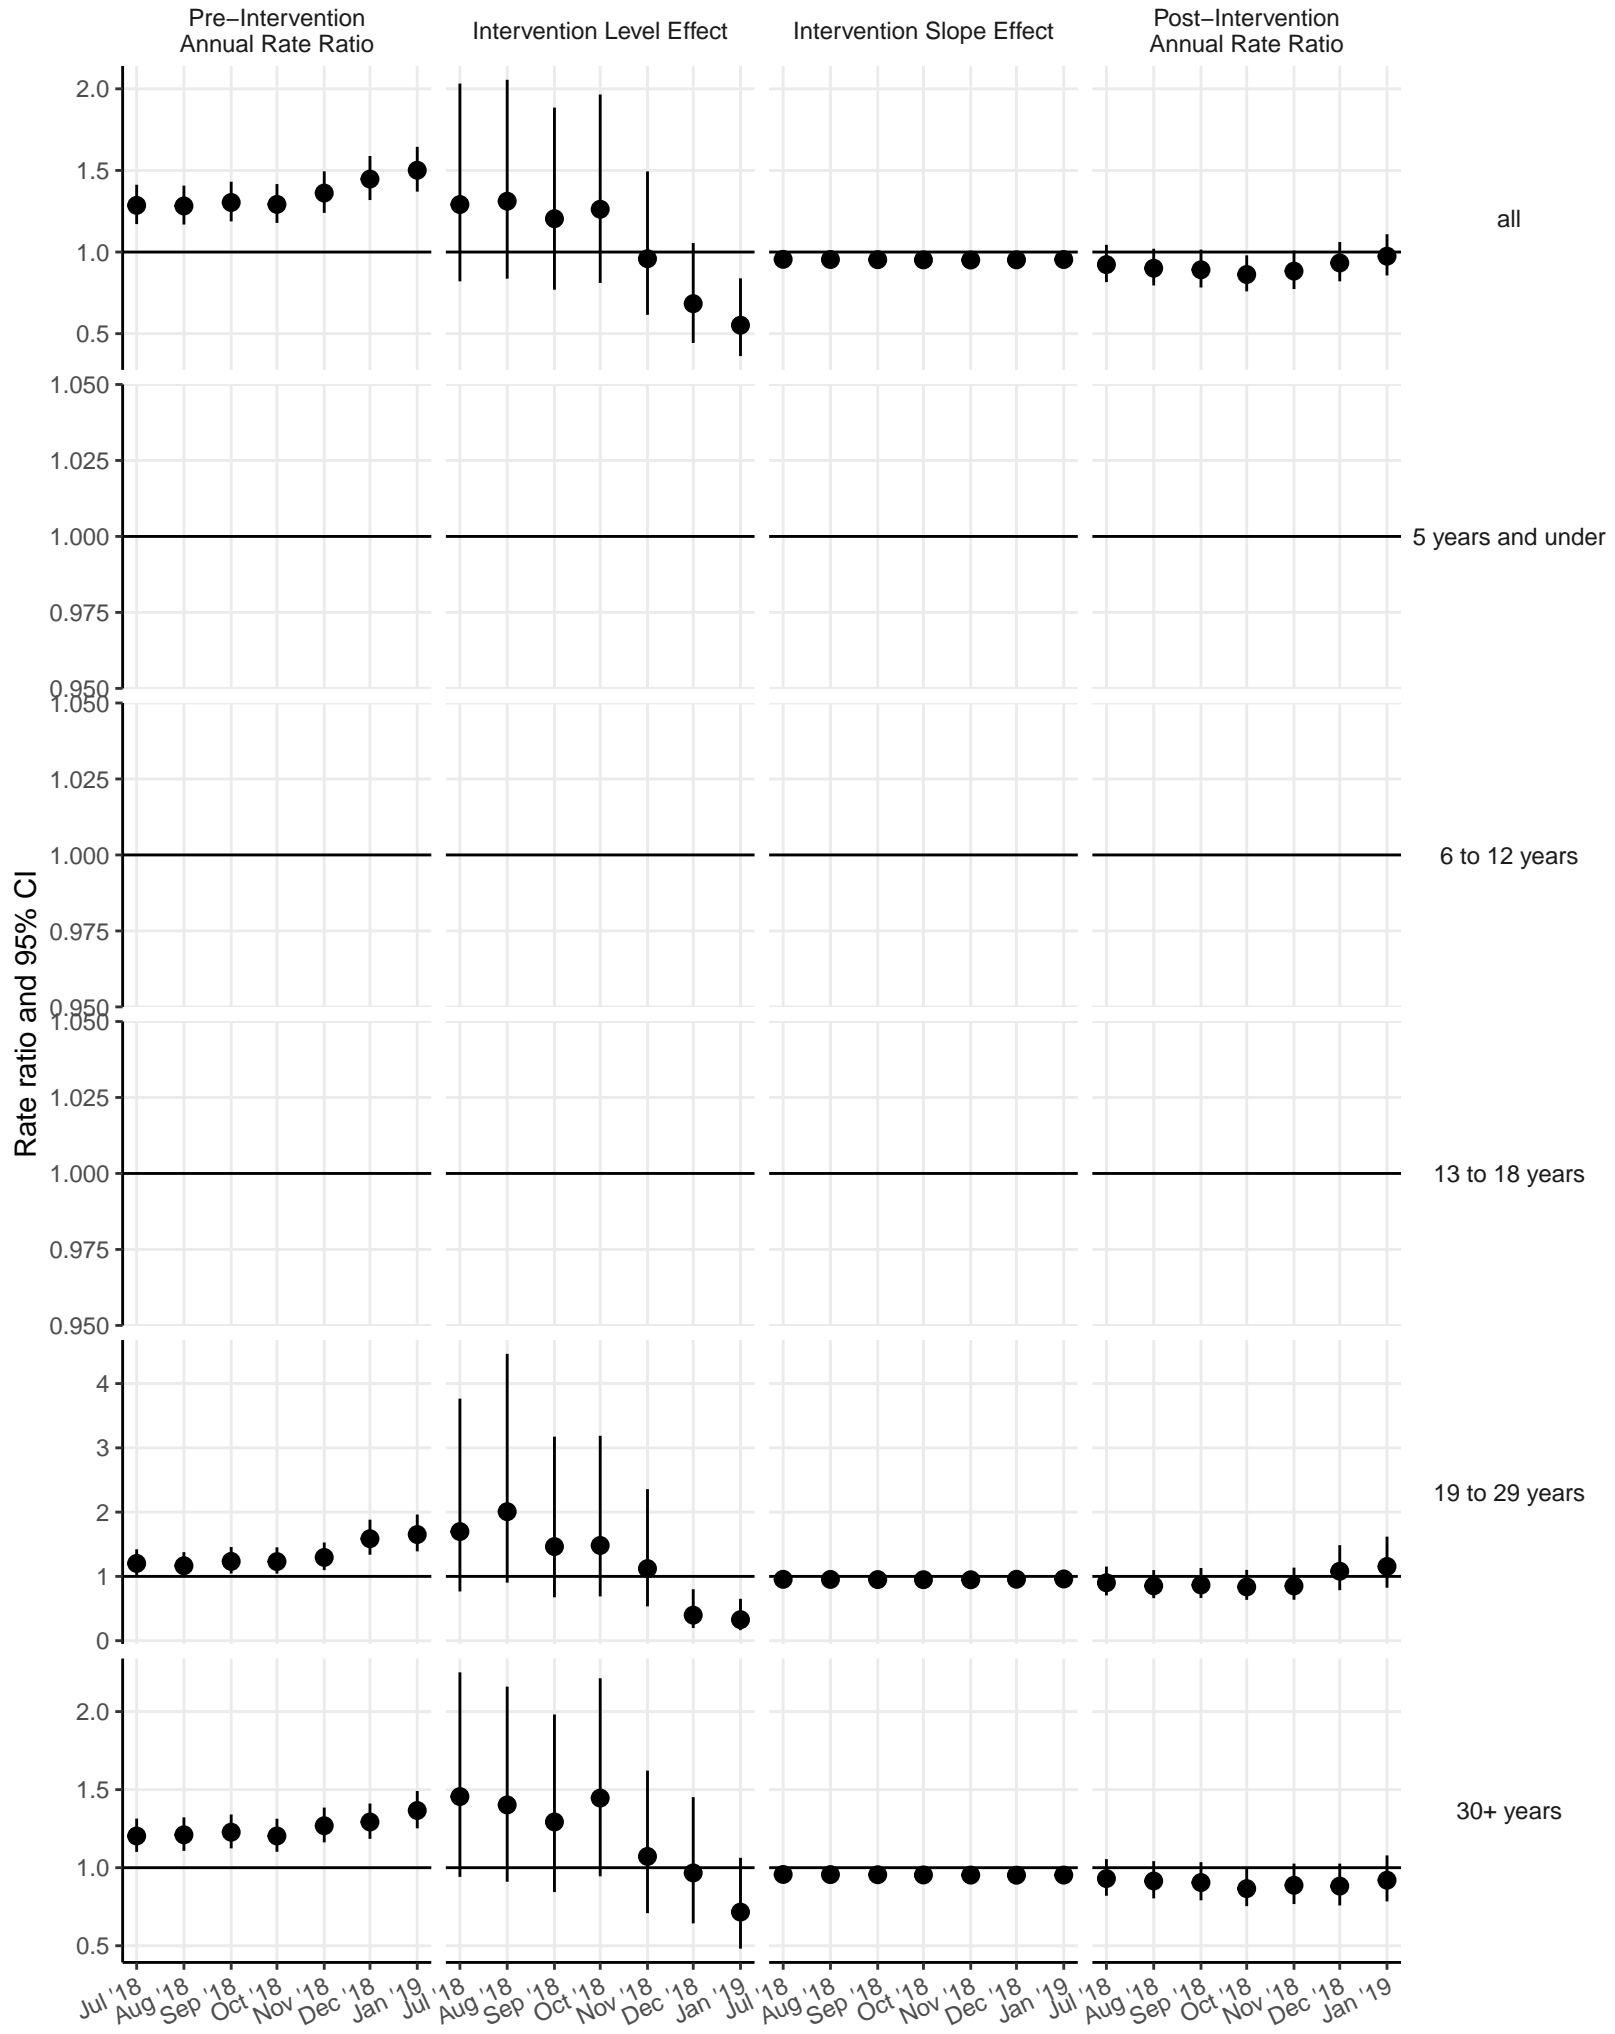

# Inhaled Concentrate

Pre-Intervention  
Annual Rate Ratio

Intervention Level Effect

Intervention Slope Effect

Post-Intervention  
Annual Rate Ratio

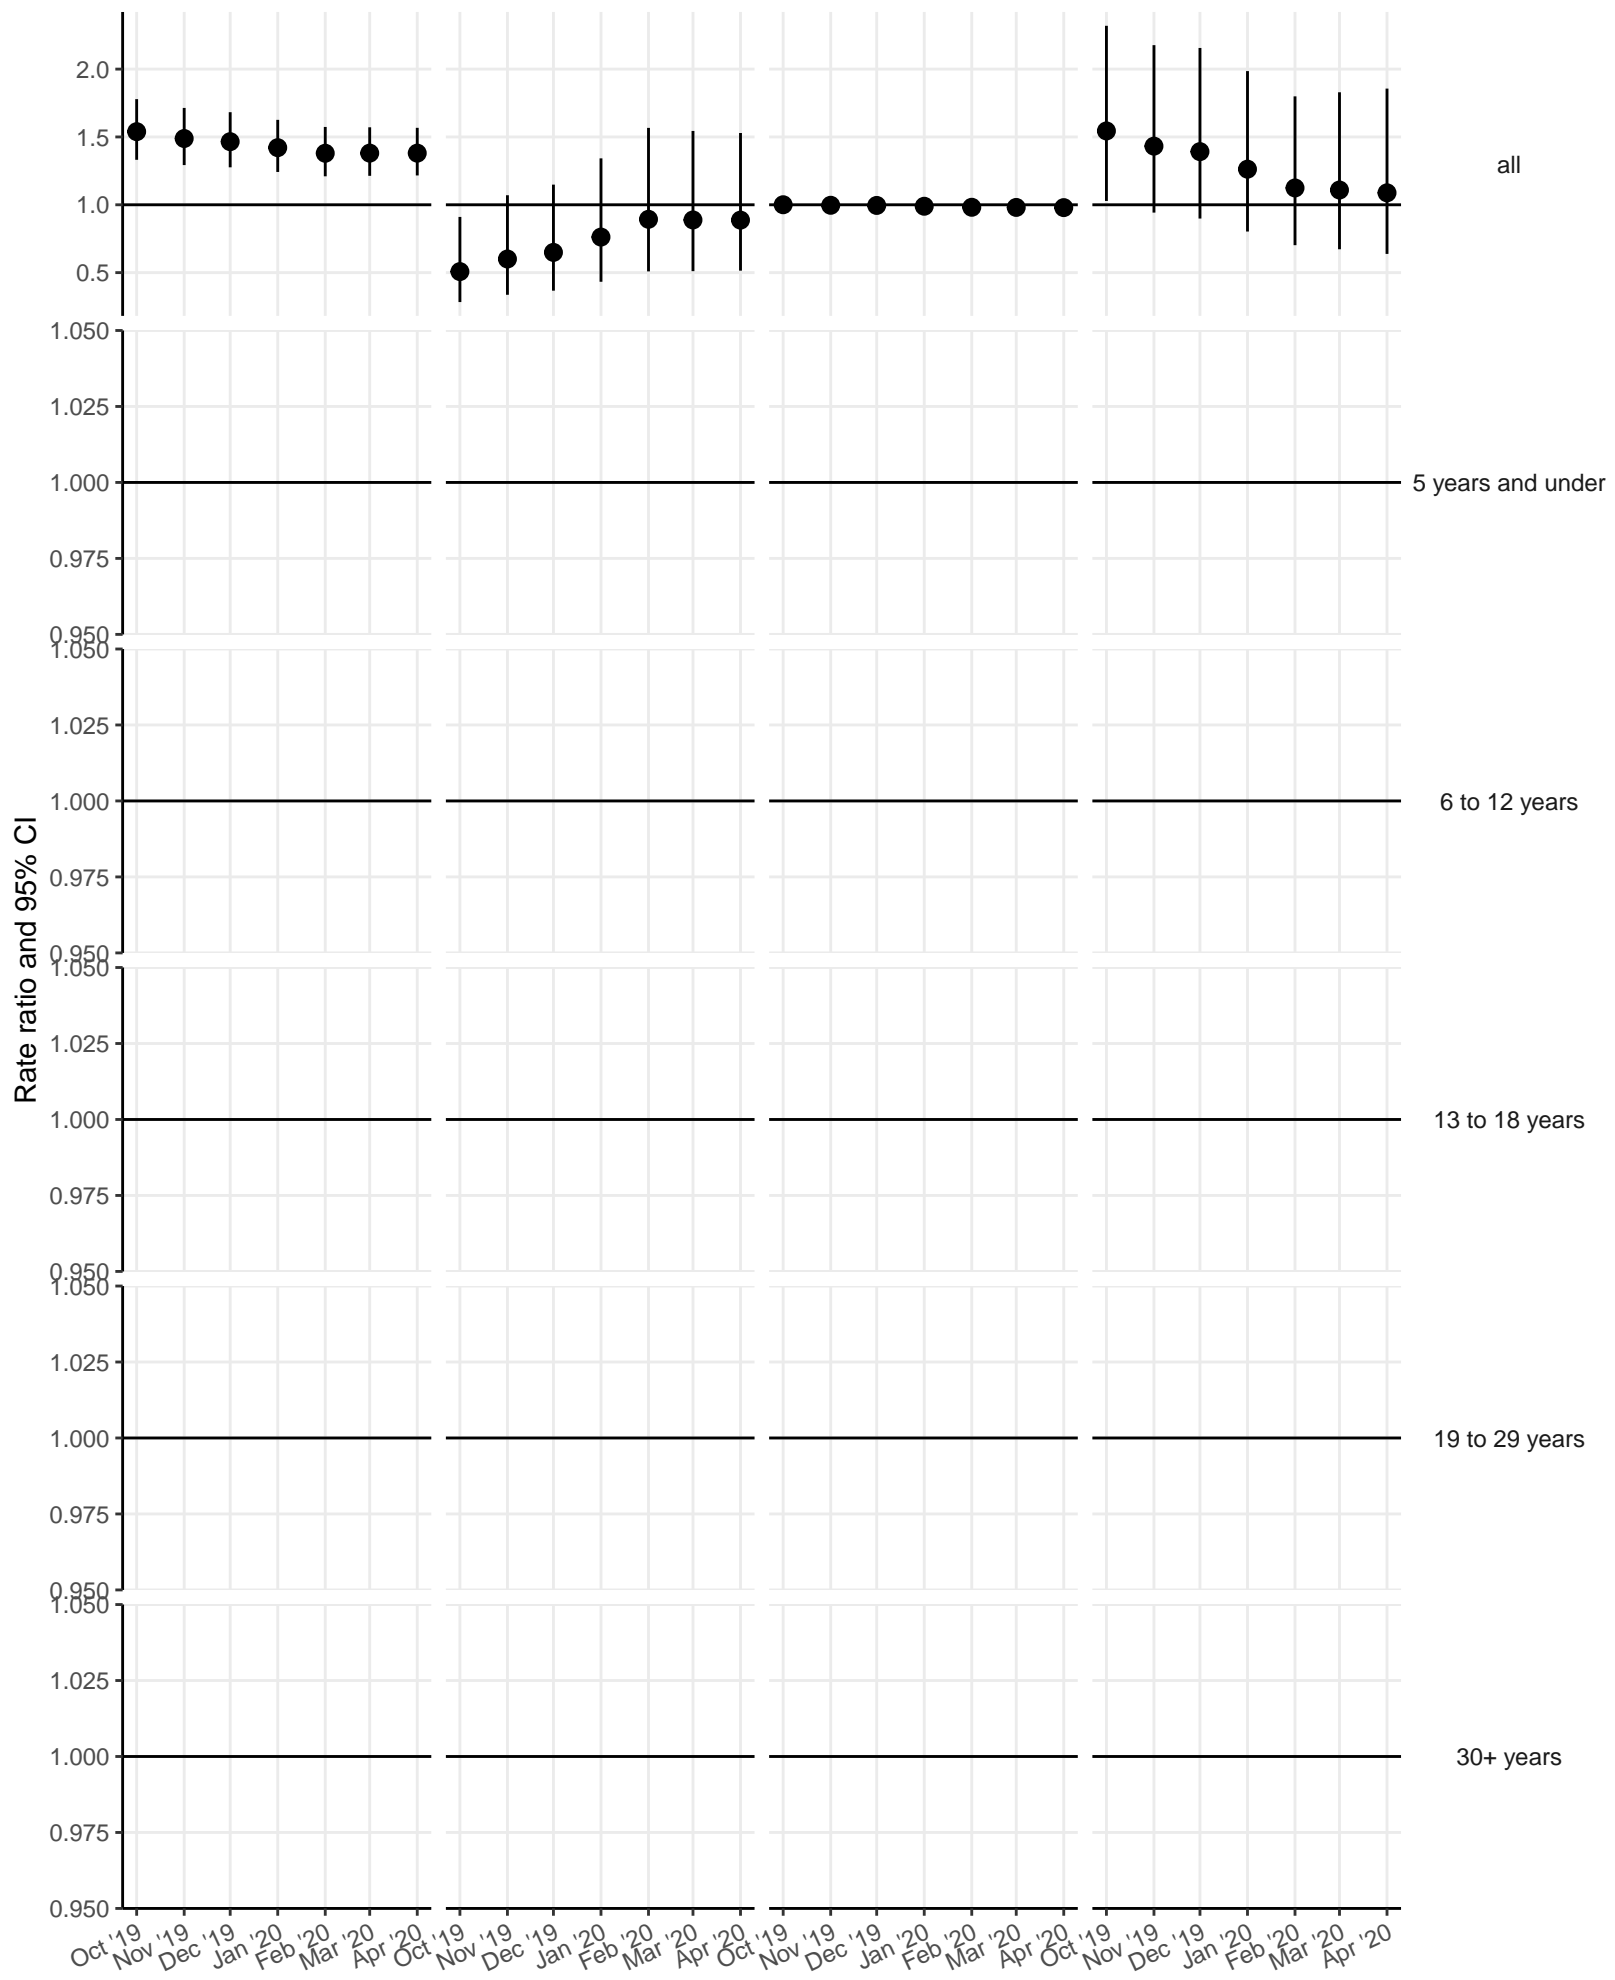

Supplement: MOESM2 [file 41997_2025_1022_MOESM2_ESM.pdf]
